# Supplementary material for: Differences in incomes of physicians in the United States by race and sex: observational study
Source: PubMed Central journal article supplement — BMJ. 2016 Jun 7;353:i2923. doi: 10.1136/bmj.i2923 (PMC4897176; doi:10.1136/bmj.i2923), 2016-06-07
Supplement: lyda029507.ww1_default.pdf [file lyda029507.ww1_default.pdf]

**Appendix: Supplementary tables [posted as supplied by author]**

**Table A:** Trends in log of adjusted annual median income of U.S. physicians in the American Community Survey, according to race and sex, 2000 to 2013

|                                                          | <b>Log of adjusted annual median earned income, dollars (95% CI)</b> |                     |                     |
|----------------------------------------------------------|----------------------------------------------------------------------|---------------------|---------------------|
|                                                          | 2000-2004                                                            | 2005-2009           | 2010-2013           |
| <b>Race</b>                                              |                                                                      |                     |                     |
| Whites                                                   | 12.07 (12.05-12.09)                                                  | 12.20 (12.19-12.22) | 12.26 (12.25-12.28) |
| Blacks                                                   | 11.93 (11.89-11.97)                                                  | 11.97 (11.92-12.02) | 12.10 (12.03-12.18) |
| White-black difference                                   | 0.14 (0.10-0.18)                                                     | 0.23 (0.18-0.28)    | 0.16 (0.09-0.24)    |
| p-value for white-black difference compared to 2000-2004 |                                                                      | p=0.003             | p=0.58              |
| <b>Sex</b>                                               |                                                                      |                     |                     |
| Males                                                    | 12.13 (12.11-12.15)                                                  | 12.30 (12.28-12.32) | 12.37 (12.35-12.38) |
| Females                                                  | 11.87 (11.83-11.91)                                                  | 11.87 (11.85-11.89) | 11.93 (11.91-11.96) |
| Male-female difference                                   | 0.26 (0.21-0.30)                                                     | 0.43 (0.40-0.46)    | 0.43 (0.41-0.46)    |
| p-value for male-female difference compared to 2000-2004 |                                                                      | p<0.001             | p<0.001             |

**Notes:** Authors' calculation using income data from the U.S. Census American Community Survey from 2000 to 2013. Log of adjusted earned incomes are the predicted values from a multivariable median regression of log of annual employment income as a function of age (categorized as 35-39 years, 40-49 years, 50-59 years, and 60 years and above), sex, race, hours worked (categorized as 39 hours and below, 40-49 hours, 50-59 hours, and 60 hours and above), time period, state fixed effects, and full interactions between race, sex, and time period. P-values are for comparison of male-female (or white-black) income difference in 2005-2009 or 2010-2013 compared to 2000-2004. All dollar values were normalized to 2013 dollars according to the Consumer Price Index.

**Table B:** Trends in adjusted annual median income of U.S. physicians in the American Community Survey, according to race and sex, 2000 to 2013, using continuous age and hours worked

|                                                          | <b>Adjusted annual median earned income, dollars (95% CI)</b> |                           |                           |
|----------------------------------------------------------|---------------------------------------------------------------|---------------------------|---------------------------|
|                                                          | 2000-2004                                                     | 2005-2009                 | 2010-2013                 |
| <b>Race</b>                                              |                                                               |                           |                           |
| Whites                                                   | 186,063 (182,338-189,789)                                     | 210,131 (207,140-213,121) | 225,664 (222,320-229,008) |
| Blacks                                                   | 167,344 (147,264-187,424)                                     | 172,484 (163,334-181,634) | 193,180 (183,376-202,985) |
| White-black difference                                   | 18,719 (-1,507-38,945)                                        | 37,646 (28,595-46,698)    | 32,484 (22,603-42,364)    |
| p-value for white-black difference compared to 2000-2004 |                                                               | p=0.09                    | p=0.23                    |
| <b>Sex</b>                                               |                                                               |                           |                           |
| Males                                                    | 195,793 (191,113-200,473)                                     | 227,247 (223,392-231,102) | 245,166 (240,933-249,400) |
| Females                                                  | 154,586 (149,971-159,201)                                     | 153,689 (150,686-156,692) | 163,712 (160,070-167,355) |
| Male-female difference                                   | 41,207 (34,953-47,462)                                        | 73,558 (68,734-78,383)    | 81,454 (75,927-86,981)    |
| p-value for male-female difference compared to 2000-2004 |                                                               | p<0.001                   | p<0.001                   |

**Notes:** Authors' calculation using income data from the U.S. Census American Community Survey from 2000 to 2013. Adjusted earned incomes are the predicted values from a multivariable median regression of annual employment income as a function of continuous age, sex, race, continuous hours worked, time period, state fixed effects, and full interactions between race, sex, and time period. P-values are for comparison of male-female (or white-black) income difference in 2005-2009 or 2010-2013 compared to 2000-2004. All dollar values were normalized to 2013 dollars according to the Consumer Price Index.

**Table C:** Trends in adjusted annual median income of U.S. physicians in the American Community Survey, according to race and sex, 2005 to 2013, including metropolitan status

|                                                          | <b>Adjusted annual median earned income, dollars (95% CI)</b> |                           |
|----------------------------------------------------------|---------------------------------------------------------------|---------------------------|
|                                                          | 2005-2009                                                     | 2010-2013                 |
| <b>Race</b>                                              |                                                               |                           |
| Whites                                                   | 211,664 (208,311-215,017)                                     | 224,428 (221,608-227,247) |
| Blacks                                                   | 173,992 (168,040-179,944)                                     | 192,015 (178,595-205,436) |
| White-black difference                                   | 37,672 (32,086-43,259)                                        | 32,413 (19,013-45,812)    |
| p-value for white-black difference compared to 2005-2009 |                                                               | p=0.48                    |
| <b>Sex</b>                                               |                                                               |                           |
| Males                                                    | 229,952 (225,727-234,178)                                     | 244,163 (240,794-247,532) |
| Females                                                  | 156,275 (153,022-159,529)                                     | 166,515 (162,649-170,381) |
| Male-female difference                                   | 73,677 (68,753-78,601)                                        | 77,648 (73,109-82,187)    |
| p-value for male-female difference compared to 2005-2009 |                                                               | p=0.22                    |

**Notes:** Authors' calculation using income data from the U.S. Census American Community Survey from 2005 to 2013. Adjusted earned incomes are the predicted values from a multivariable median regression of annual employment income as a function of age (categorized as 35-39 years, 40-49 years, 50-59 years, and 60 years and above), sex, race, hours worked (categorized as 39 hours and below, 40-49 hours, 50-59 hours, and 60 hours and above), time period, metropolitan status, state fixed effects, and full interactions between race, sex, and time period. P-values are for comparison of male-female (or white-black) income difference in 2010-2013 compared to 2005-2009. All dollar values were normalized to 2013 dollars according to the Consumer Price Index.

**Table D:** Trends in adjusted annual median income of U.S. physicians in the American Community Survey, according to race and sex, 2000 to 2008

|                                                          | <b>Adjusted annual median earned income, dollars (95% CI)</b> |                           |
|----------------------------------------------------------|---------------------------------------------------------------|---------------------------|
|                                                          | 2000-2004                                                     | 2005-2008                 |
| <b>Race</b>                                              |                                                               |                           |
| Whites                                                   | 185,085 (181,512-188,658)                                     | 207,368 (203,514-211,222) |
| Blacks                                                   | 162,391 (152,605-172,178)                                     | 168,039 (160,886-175,192) |
| White-black difference                                   | 22,693 (12,887-32,499)                                        | 39,329 (32,586-46,071)    |
| p-value for white-black difference compared to 2000-2004 |                                                               | p=0.005                   |
| <b>Sex</b>                                               |                                                               |                           |
| Males                                                    | 194,344 (190,450-198,237)                                     | 222,916 (218,145-227,686) |
| Females                                                  | 151,459 (145,998-156,919)                                     | 150,624 (146,609-154,640) |
| Male-female difference                                   | 42,885 (36,994-48,776)                                        | 72,291 (66,301-78,281)    |
| p-value for male-female difference compared to 2000-2004 |                                                               | p<0.001                   |

**Notes:** Authors' calculation using income data from the U.S. Census American Community Survey from 2000 to 2008. Adjusted earned incomes are the predicted values from a multivariable median regression of annual employment income as a function of age (categorized as 35-39 years, 40-49 years, 50-59 years, and 60 years and above), sex, race, hours worked (categorized as 39 hours and below, 40-49 hours, 50-59 hours, and 60 hours and above), time period, state fixed effects, and full interactions between race, sex, and time period. P-values are for comparison of male-female (or white-black) income difference in 2005-2008 compared to 2000-2004. All dollar values were normalized to 2013 dollars according to the Consumer Price Index.

**Table E:** Trends in adjusted median hourly wage of U.S. physicians in the American Community Survey, according to race and sex, 2000 to 2013

|                                                          | <b>Adjusted median earned hourly wage, dollars (95% CI)</b> |                  |                  |
|----------------------------------------------------------|-------------------------------------------------------------|------------------|------------------|
|                                                          | 2000-2004                                                   | 2005-2009        | 2010-2013        |
| <b>Race</b>                                              |                                                             |                  |                  |
| Whites                                                   | 50.1 (48.7-51.6)                                            | 64.7 (63.7-65.7) | 78.4 (77.2-79.7) |
| Blacks                                                   | 44.6 (35.9-53.2)                                            | 53.6 (49.3-57.9) | 68.6 (65.5-71.7) |
| White-black difference                                   | 5.5 (-3.2-14.3)                                             | 11.1 (6.7-15.4)  | 9.8 (6.5-13.1)   |
| p-value for white-black difference compared to 2000-2004 |                                                             | p=0.27           | p=0.37           |
| <b>Sex</b>                                               |                                                             |                  |                  |
| Males                                                    | 52.4 (50.7-54.2)                                            | 69.2 (68.0-70.5) | 84.1 (82.6-85.6) |
| Females                                                  | 42.4 (40.0-44.7)                                            | 49.4 (48.1-50.7) | 60.3 (58.5-62.1) |
| Male-female difference                                   | 10.0 (7.2-12.9)                                             | 19.9 (18.1-21.6) | 23.8 (21.5-26.1) |
| p-value for male-female difference compared to 2000-2004 |                                                             | p<0.001          | p<0.001          |

**Notes:** Authors' calculation using income data from the U.S. Census American Community Survey from 2000 to 2013. Adjusted earned incomes are the predicted values from a multivariable median regression of hourly wage as a function of age (categorized as 35-39 years, 40-49 years, 50-59 years, and 60 years and above), sex, race, time period, state fixed effects, and full interactions between race, sex, and time period. P-values are for comparison of male-female (or white-black) income difference in 2005-2009 or 2010-2013 compared to 2000-2004. All dollar values were normalized to 2013 dollars according to the Consumer Price Index.

**Table F:** Trends in adjusted annual median income of U.S. physicians in the American Community Survey, according to race and sex, 2000 to 2013, without survey weights

|                                                          | <b>Adjusted annual median earned income, dollars (95% CI)</b> |                           |                           |
|----------------------------------------------------------|---------------------------------------------------------------|---------------------------|---------------------------|
|                                                          | 2000-2004                                                     | 2005-2009                 | 2010-2013                 |
| <b>Race</b>                                              |                                                               |                           |                           |
| Whites                                                   | 188,230 (185,408-191,051)                                     | 220,012 (217,017-223,008) | 232,926 (230,493-235,358) |
| Blacks                                                   | 170,034 (158,000-182,068)                                     | 181,254 (176,458-186,049) | 201,143 (192,232-210,054) |
| White-black difference                                   | 18,195 (6,217-30,174)                                         | 38,759 (34,204-43,313)    | 31,783 (22,798-40,768)    |
| p-value for white-black difference compared to 2000-2004 |                                                               | p=0.001                   | p=0.06                    |
| <b>Sex</b>                                               |                                                               |                           |                           |
| Males                                                    | 197,571 (194,098-201,043)                                     | 238,102 (234,300-241,905) | 252,289 (249,321-255,258) |
| Females                                                  | 157,960 (154,422-161,498)                                     | 160,594 (157,789-163,399) | 171,522 (168,413-174,631) |
| Male-female difference                                   | 39,611 (35,011-44,210)                                        | 77,508 (72,923-82,094)    | 80,767 (76,663-84,871)    |
| p-value for male-female difference compared to 2000-2004 |                                                               | p<0.001                   | p<0.001                   |

**Notes:** Authors' calculation using income data from the U.S. Census American Community Survey from 2000 to 2013. Adjusted earned incomes are the predicted values from an unweighted multivariable median regression of annual employment income as a function of age (categorized as 35-39 years, 40-49 years, 50-59 years, and 60 years and above), sex, race, hours worked (categorized as 39 hours and below, 40-49 hours, 50-59 hours, and 60 hours and above), time period, state fixed effects, and full interactions between race, sex, and time period. P-values are for comparison of male-female (or white-black) income difference in 2005-2009 or 2010-2013 compared to 2000-2004. All dollar values were normalized to 2013 dollars according to the Consumer Price Index.

**Table G:** Income distribution of U.S. physicians in the HSC Physician Surveys, by race-sex subgroup

|                   | No Specialty or Practice Characteristics Controls |                        |                        |                        | With Specialty and Practice Characteristics Controls |                        |                        |                        |
|-------------------|---------------------------------------------------|------------------------|------------------------|------------------------|------------------------------------------------------|------------------------|------------------------|------------------------|
| Income range (\$) | White male                                        | Black male             | White female           | Black female           | White male                                           | Black male             | White female           | Black female           |
| < =100,000        | 0.085<br>(0.079-0.091)                            | 0.164<br>(0.127-0.201) | 0.224<br>(0.208-0.240) | 0.255<br>(0.210-0.300) | 0.090<br>(0.084-0.097)                               | 0.132<br>(0.101-0.164) | 0.192<br>(0.179-0.206) | 0.197<br>(0.166-0.229) |
| 100,001-150,000   | 0.164<br>(0.156-0.171)                            | 0.243<br>(0.216-0.270) | 0.277<br>(0.263-0.290) | 0.288<br>(0.270-0.307) | 0.169<br>(0.161-0.176)                               | 0.208<br>(0.183-0.233) | 0.245<br>(0.233-0.258) | 0.248<br>(0.230-0.266) |
| 150,001-200,000   | 0.216<br>(0.207-0.225)                            | 0.237<br>(0.227-0.247) | 0.226<br>(0.216-0.236) | 0.217<br>(0.200-0.234) | 0.219<br>(0.211-0.228)                               | 0.232<br>(0.222-0.242) | 0.232<br>(0.222-0.241) | 0.231<br>(0.221-0.241) |
| 200,001-250,000   | 0.166<br>(0.158-0.174)                            | 0.139<br>(0.123-0.155) | 0.115<br>(0.108-0.123) | 0.104<br>(0.088-0.120) | 0.167<br>(0.159-0.176)                               | 0.157<br>(0.145-0.168) | 0.137<br>(0.129-0.144) | 0.135<br>(0.123-0.147) |
| >250,000          | 0.369<br>(0.357-0.380)                            | 0.218<br>(0.173-0.263) | 0.158<br>(0.145-0.171) | 0.136<br>(0.107-0.165) | 0.354<br>(0.344-0.365)                               | 0.271<br>(0.221-0.321) | 0.194<br>(0.179-0.209) | 0.189<br>(0.158-0.220) |

Note: Authors' calculation using income data from the Center for Studying Health System Change Physician Surveys (2000-2001, 2004-2005, 2008). Adjusted income categories are the predicted categories from a multivariable ordered logit regression of net income from the practice of medicine as a function of age (categorized as 35-39 years, 40-49 years, 50-59 years, and 60 years and above), sex, race, hours worked (categorized as 39 hours and below, 40-49 hours, 50-59 hours, and 60 hours and above), years in practice, practice type (solo/2 physicians, group practice, HMO, medical school, hospital-based, and other), percent revenue from Medicare, and percent revenue from Medicaid. Panel A adjusts for age, sex, race, and hours worked. Panel B also includes adjustments for years in practice, practice type, percent revenue from Medicare, percent revenue from Medicaid, and specialty type. All dollar values were normalized to 2008 dollars according to the Consumer Price Index.

**Table H:** Adjusted income of U.S. physicians in the HSC Physician Surveys, by race-sex subgroup

|              | <b>No Specialty and Practice Characteristics Controls</b> | <b>With Specialty and Practice Characteristics Controls</b> |
|--------------|-----------------------------------------------------------|-------------------------------------------------------------|
| Male White   | 229,157 (226,515-231,799)                                 | 224,244 (221,919-226,568)                                   |
| Male Black   | 186,860 (170,427-203,294)                                 | 202,390 (184,448-220,332)                                   |
| Female White | 167,521 (162,545-172,497)                                 | 180,556 (175,863-185,249)                                   |
| Female Black | 156,173 (143,550-168,796)                                 | 178,032 (166,751-189,313)                                   |

Note: Authors' calculation using income data from the Center for Studying Health System Change Physician Surveys (2000-2001, 2004-2005, 2008). Adjusted earned incomes are the predicted values from a multivariable linear regression of net income from the practice of medicine as a function of age (categorized as 35-39 years, 40-49 years, 50-59 years, and 60 years and above), sex, race, hours worked (categorized as 39 hours and below, 40-49 hours, 50-59 hours, and 60 hours and above), years in practice, practice type (solo/2 physicians, group practice, HMO, medical school, hospital-based, and other), percent revenue from Medicare, and percent revenue from Medicaid. For 2008, the income categories (less than \$100,000; \$100,001 to \$150,000; \$150,001 to \$200,000; \$200,001 to \$250,000; more than \$250,000) were replaced with the median value of that category from 2004-2005. The second column adjusts for age, sex, race, and hours worked. The third column also includes adjustments for years in practice, practice type, percent revenue from Medicare, percent revenue from Medicaid, and specialty type. All dollar values were normalized to 2008 dollars according to the Consumer Price Index.

**Table I:** Adjusted income of U.S. physicians in the HSC Physician Surveys, by race-sex subgroup, including weeks worked

|              | <b>No Specialty and Practice Characteristics Controls</b> | <b>With Specialty and Practice Characteristics Controls</b> |
|--------------|-----------------------------------------------------------|-------------------------------------------------------------|
| Male White   | 229,426 (226,781-232,070)                                 | 224,405 (222,084-226,725)                                   |
| Male Black   | 187,286 (170,773-203,799)                                 | 203,014 (185,040-220,988)                                   |
| Female White | 167,893 (162,920-172,867)                                 | 181,289 (176,600-185,977)                                   |
| Female Black | 156,634 (143,918-169,350)                                 | 178,922 (167,577-190,268)                                   |

Note: Authors' calculation using income data from the Center for Studying Health System Change Physician Surveys (2000-2001, 2004-2005, 2008). Adjusted earned incomes are the predicted values from a multivariable linear regression of net income from the practice of medicine as a function of age (categorized as 35-39 years, 40-49 years, 50-59 years, and 60 years and above), sex, race, hours worked (categorized as 39 hours and below, 40-49 hours, 50-59 hours, and 60 hours and above), weeks worked, years in practice, practice type (solo/2 physicians, group practice, HMO, medical school, hospital-based, and other), percent revenue from Medicare, and percent revenue from Medicaid. For 2008, the income categories (less than \$100,000; \$100,001 to \$150,000; \$150,001 to \$200,000; \$200,001 to \$250,000; more than \$250,000) were replaced with the median value of that category from 2004-2005. The second column adjusts for age, sex, race, and hours worked. The third column also includes adjustments for years in practice, practice type, percent revenue from Medicare, percent revenue from Medicaid, and specialty type. All dollar values were normalized to 2008 dollars according to the Consumer Price Index.
